# Supplementary material for: Phase-change material filled hollow magnetic nanoparticles for cancer therapy and dual modal bioimaging
Source: Royal Society of Chemistry journal article supplement (doi:10.1039/c5nr01744k), 2015-01-01
Supplement: c5nr01744k1.pdf [file c5nr01744k1.pdf]

Supporting Information

## **Phase-change materials filled hollow magnetic nanoparticles for cancer therapy and dual modal bioimaging**

*Jinghua Li, Yan Hu, Yanhua Hou, Xinkun Shen, Gaoqiang Xu, Liangliang Dai, Jun Zhou, Yun Liu and Kaiyong Cai\**

Key Laboratory of Biorheological Science and Technology, Ministry of Education

College of Bioengineering

Chongqing University

Chongqing 400030, P. R. China

E-mail: [kaiyong\\_cai@cqu.edu.cn](mailto:kaiyong_cai@cqu.edu.cn)

## ***List of Contents***

|                                                            |    |
|------------------------------------------------------------|----|
| <b>Figure S1.</b> Physical property characterization ----- | S3 |
| <b>Figure S2.</b> Trypan blue staining -----               | S4 |
| <b>Figure S3.</b> Cell uptake -----                        | S5 |
| <b>Figure S4.</b> TUNEL staining -----                     | S6 |
| <b>Table S1.</b> Elemental analysis -----                  | S7 |
| <b>Table S2.</b> Zeta-potential measurements-----          | S8 |

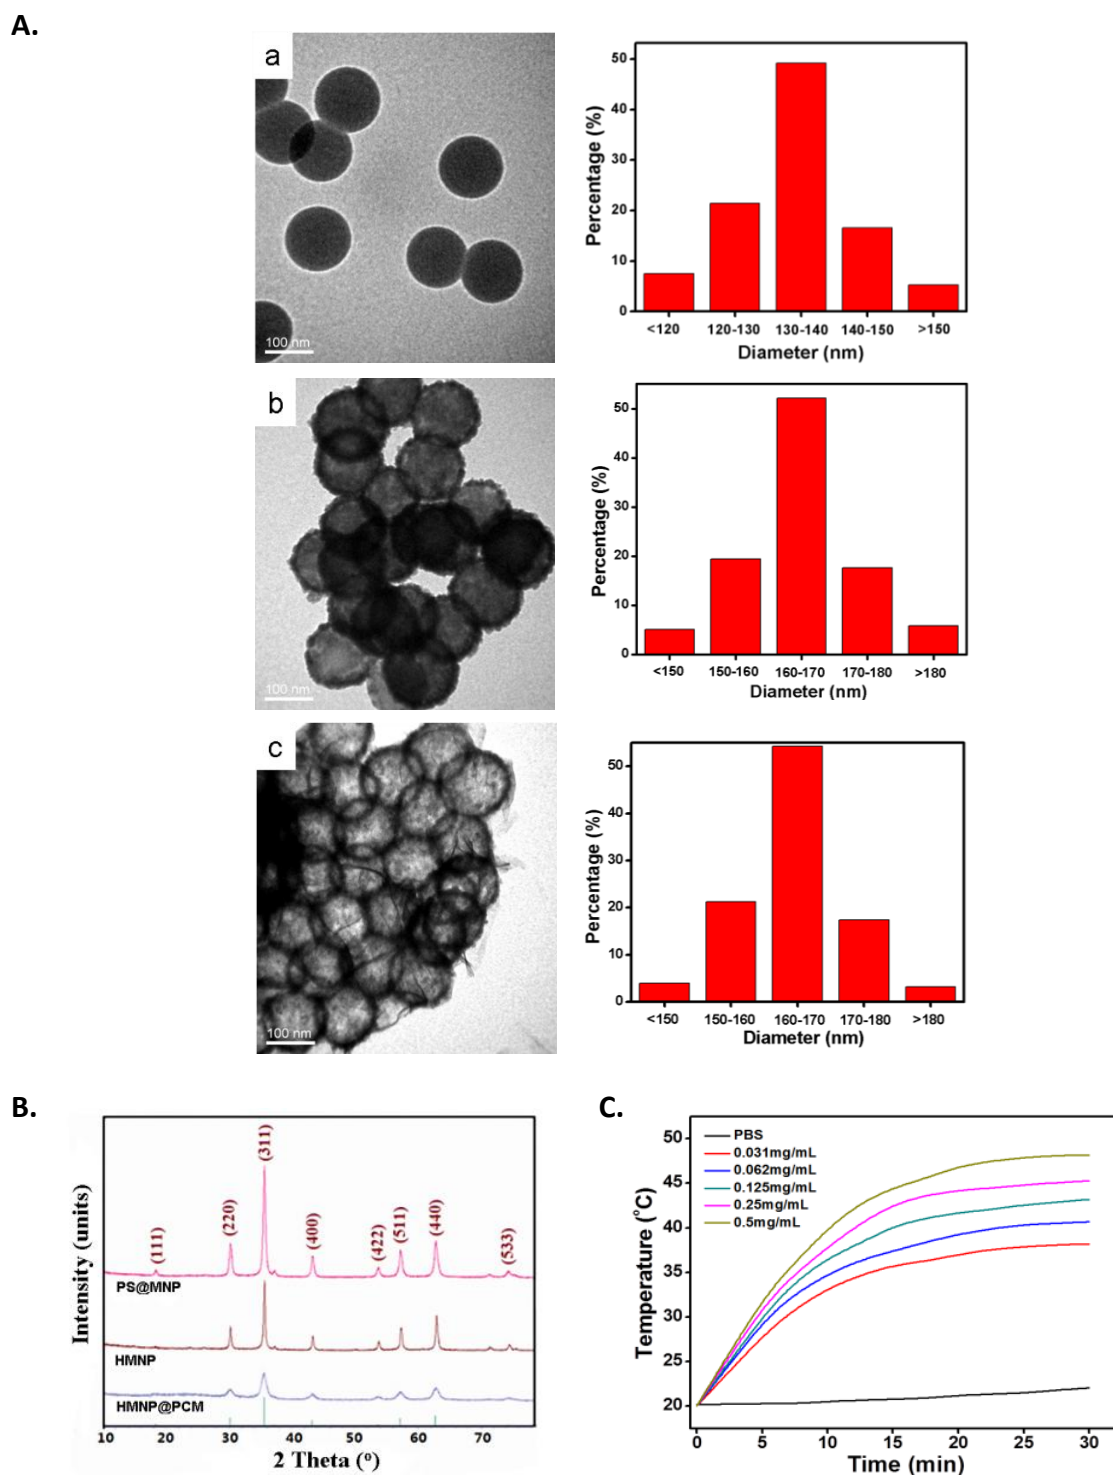

**Figure S1.** Physical property characterization: (A) TEM images and particle size distribution of: a, PS spheres; b, MNP@PS core-shell spheres; c, HMNP hollow spheres; (B) X-ray diffraction patterns of MNP@PS, HMNP and HMNP@PCM; and (C) Temperature change of PBS and HMNP@PCM@DOX solution with different concentrations when exposing to an AMF (300 A, 200 kHz, 4 kW, 30 min).

**A.**

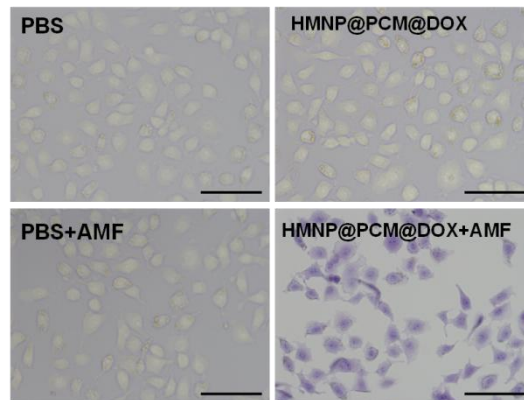

**B.**

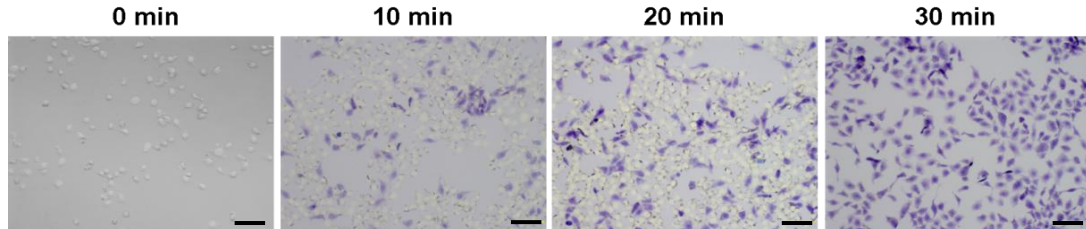

**Figure S2.** (A) Optical graphs of HepG2 cells treated with different samples in presence or absence of AMF (300 A, 200 kHz, 4 kW, 30 min, scale bar: 200  $\mu\text{m}$ ); and (B) Time-dependent HepG2 cells treated with HMNP@PCM@DOX nanoparticles. Scale bar: 50  $\mu\text{m}$ . Dead cells were reflected by blue color with trypan blue staining.

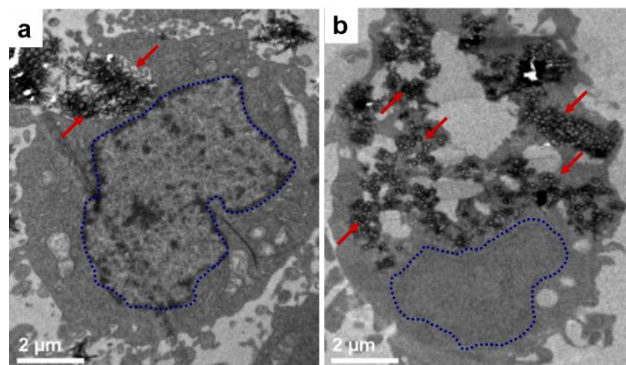

**Figure S3.** TEM images of HepG2 cells after incubation with HMNP@PCM@DOX (a: 6 h, b: 12 h). The arrows indicate the endocytosed nanoparticles.

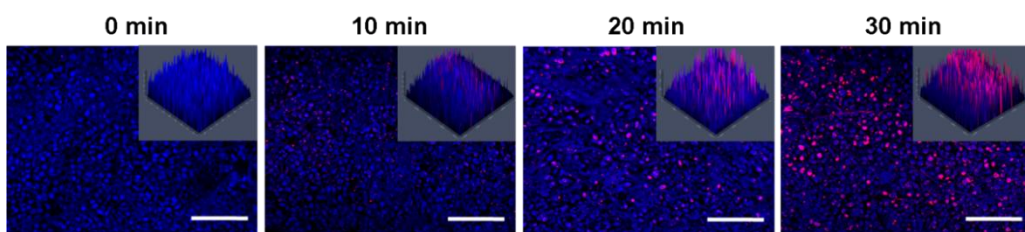

**Figure S4.** Time-dependent cells apoptosis of tumor tissues induced by thermo-chemo combination cancer therapy with TUNEL staining (300 A, 200 kHz, 4 kW, 30 min). Scale bar: 50  $\mu$ m.

**Table S1.** Elemental analysis of the as-synthesized nanoparticles at each step.

| <b><i>Materials</i></b> | <b><i>C at.%</i></b> | <b><i>N at.%</i></b> | <b><i>H at.%</i></b> | <b><i>O at.%</i></b> |
|-------------------------|----------------------|----------------------|----------------------|----------------------|
| <b>PS</b>               | 91.45                | 0.04                 | 7.57                 | 0.03                 |
| <b>MNP@PS</b>           | 39.51                | 0.08                 | 4.63                 | 15.29                |
| <b>HMNP</b>             | 2.26                 | 0.06                 | 1.84                 | 26.27                |
| <b>HMNP@PCM</b>         | 15.29                | 0.05                 | 2.73                 | 21.35                |

**Table S2.** Zeta-potentials of the as-synthesized nanoparticles at each step.

| <b><i>Materials</i></b> | <b><math>\zeta</math>-potential (mV)</b> |
|-------------------------|------------------------------------------|
| <b>PS</b>               | <b><math>-13.12 \pm 2.54</math></b>      |
| <b>MNP@PS</b>           | <b><math>-7.23 \pm 1.76</math></b>       |
| <b>HMNP</b>             | <b><math>-2.36 \pm 0.84</math></b>       |
| <b>HMNP@PCM</b>         | <b><math>6.29 \pm 1.32</math></b>        |
